# Supplementary material
Source: Royal Society of Chemistry journal article supplement (doi:10.1039/d6lf00081a)
Supplement: d6lf00081a1.pdf [file d6lf00081a1.pdf]

## Supplementary Material

### **SiO<sub>2</sub>-Templated High-Entropy Spinel Oxides with Abundant Oxygen Vacancies Enabling Lattice-Oxygen-Mediated Oxygen Evolution**

**Jingyi Zhang <sup>a</sup>, Minghui Yu <sup>a</sup>, Meiqing Shen <sup>a,c,d</sup>, Feng Gao <sup>c,d</sup>, Gurong Shen <sup>b,\*</sup>**

<sup>a</sup> *School of Chemical Engineering and Technology, Tianjin University, Tianjin 300350, PR China*

<sup>b</sup> *School of Materials Science and Engineering, Tianjin University, Tianjin 300350, PR China*

<sup>c</sup> *National Rare Earth Catalysis Research Institute, Dongying 257000, PR China*

<sup>d</sup> *State Key Laboratory of Engines, Tianjin University, Tianjin 300072, PR China*

\* Corresponding author.

E-mail address: gr\_shen@tju.edu.cn

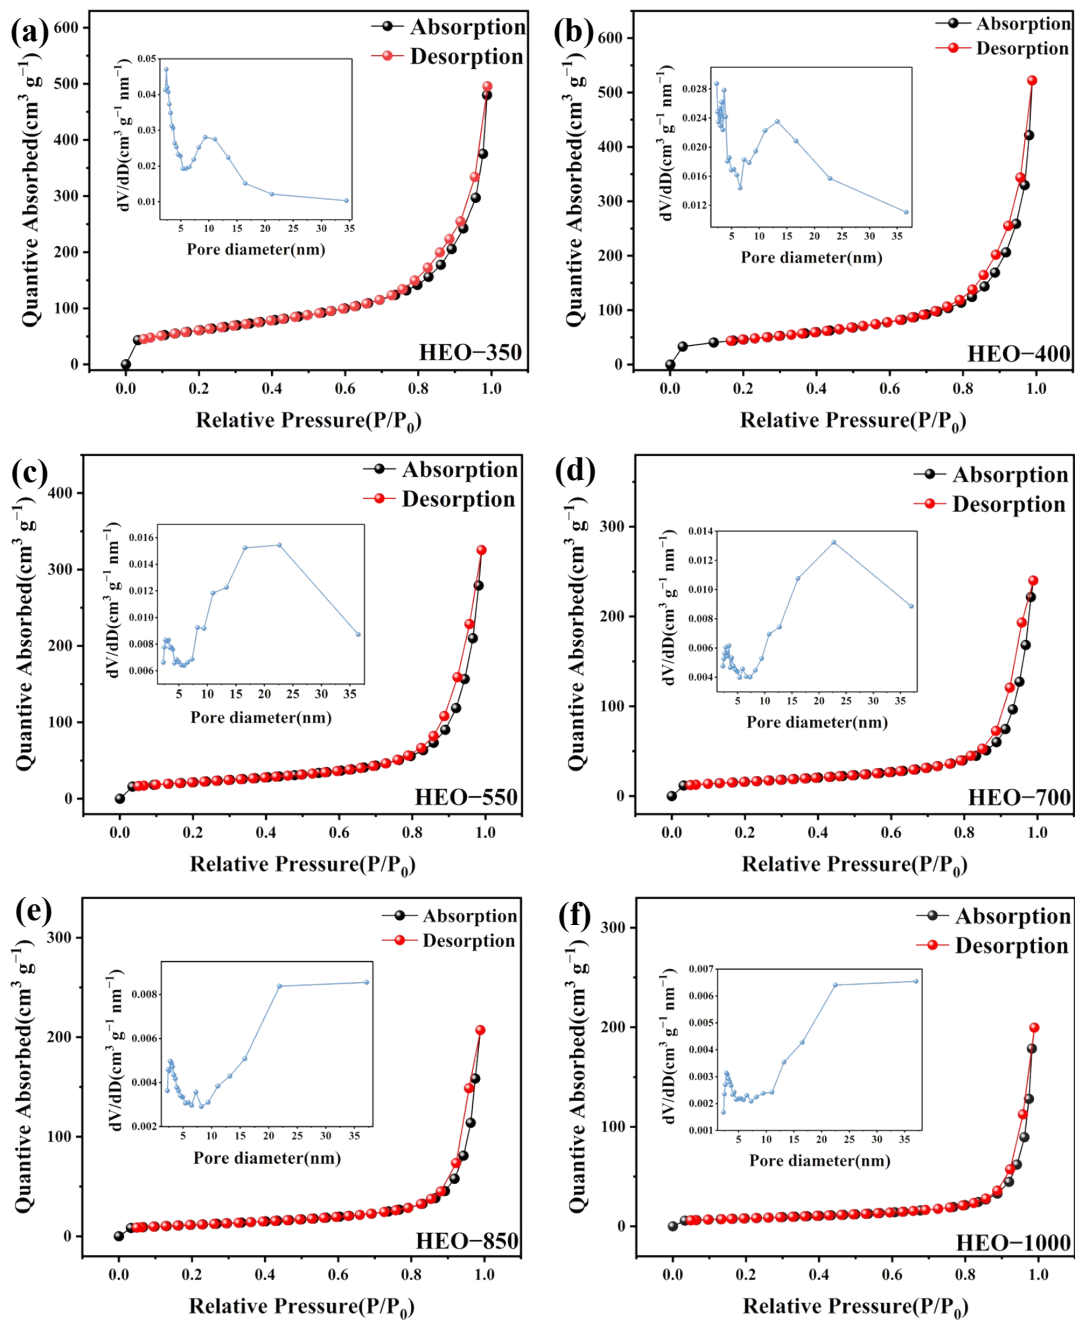

**Fig. S1.**  $N_2$  adsorption/desorption curves and corresponding pore distribution plots of HEO-T catalysts.

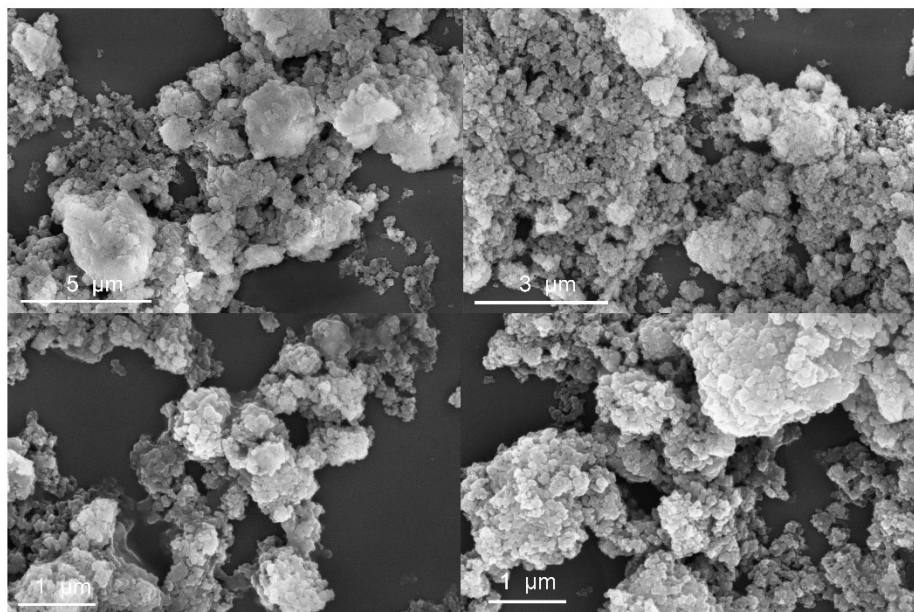

**Fig. S2.** SEM images of the sample before NaOH etching.

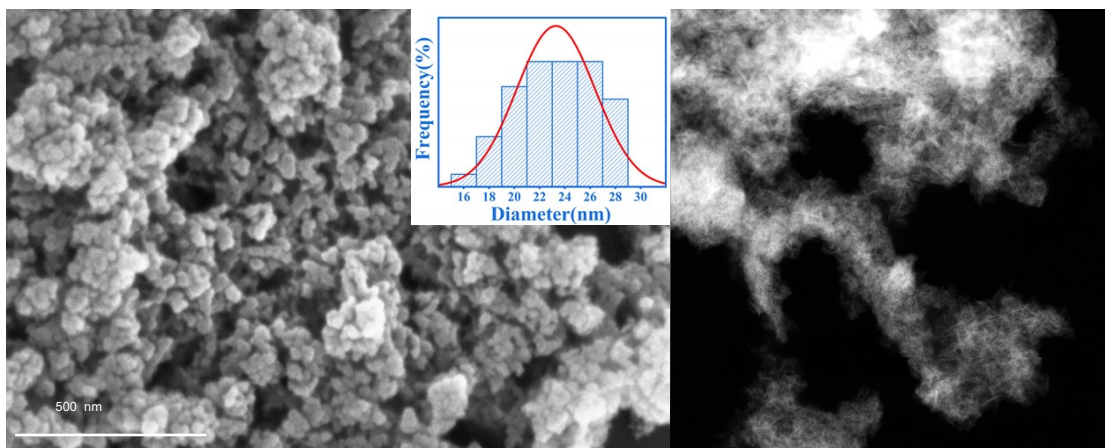

**Fig. S3.** SEM image with the inset showing the corresponding particle size distribution histogram and HADDF-STEM image of HEO-350.

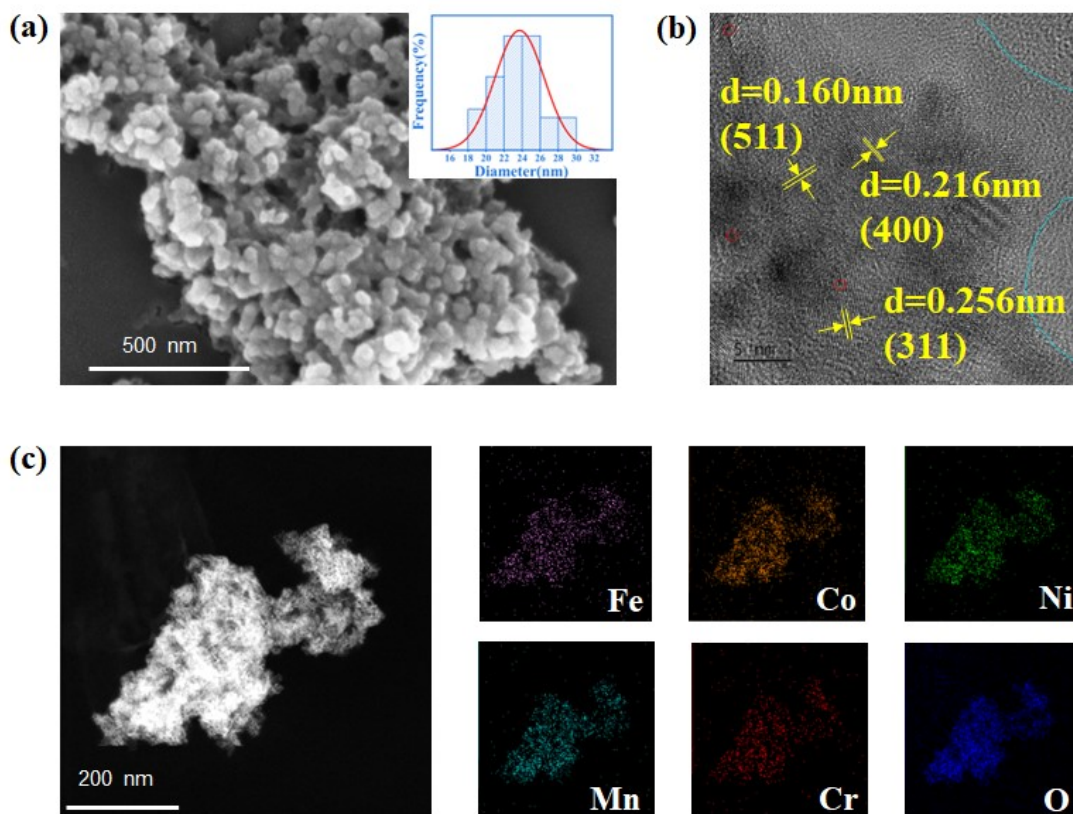

**Fig. S4.** (a) SEM image, (b) HRTEM image, (c) EDS mapping of HEO-400.

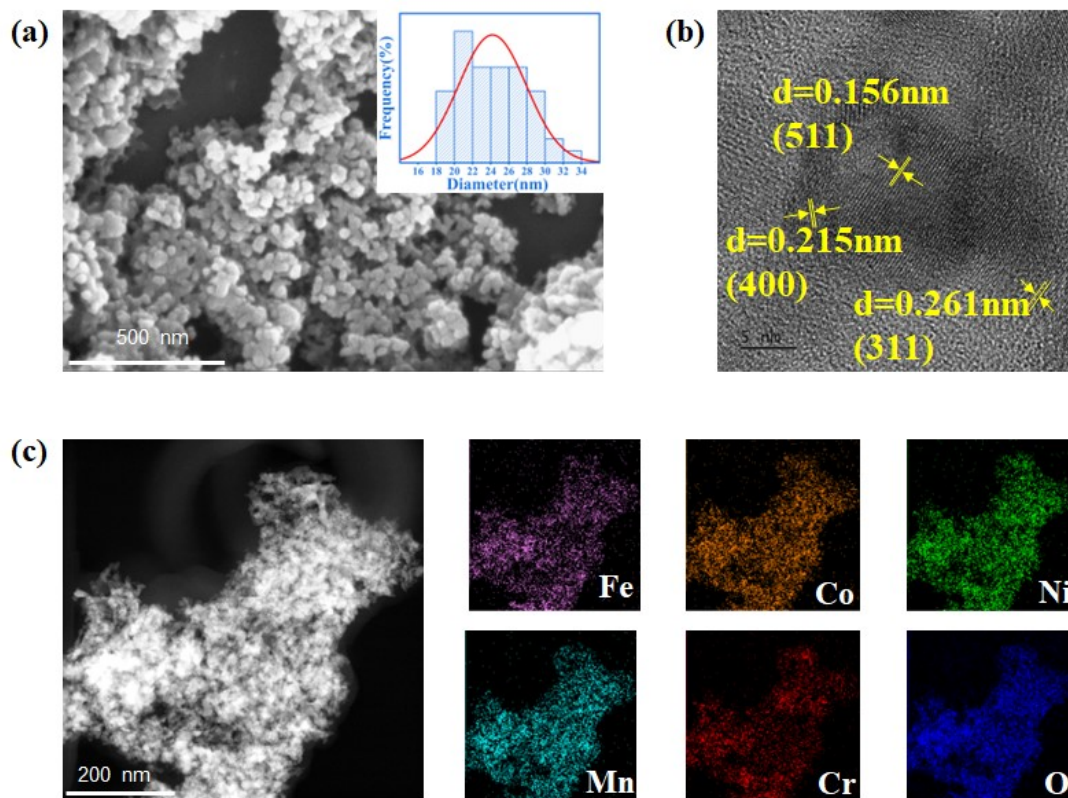

**Fig. S5.** (a) SEM image, (b) HRTEM image, (c) EDS mapping of HEO-550.

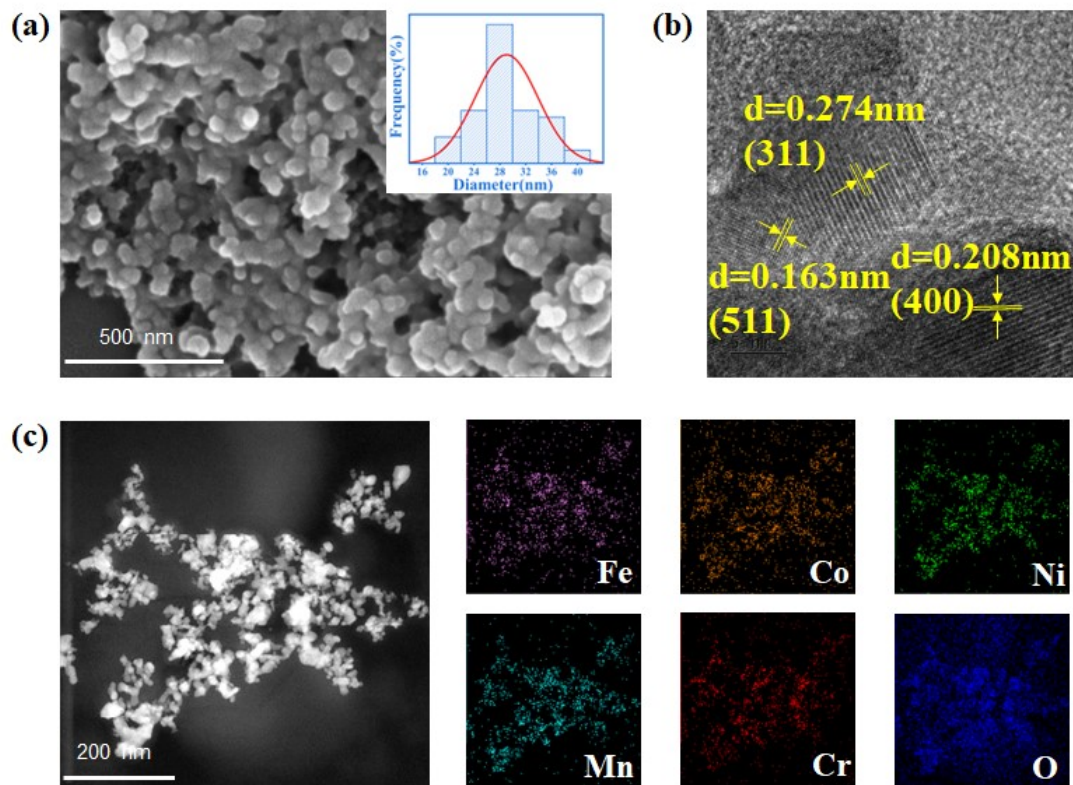

**Fig. S6.** (a) SEM image, (b) HRTEM image, (c) EDS mapping of HEO-700.

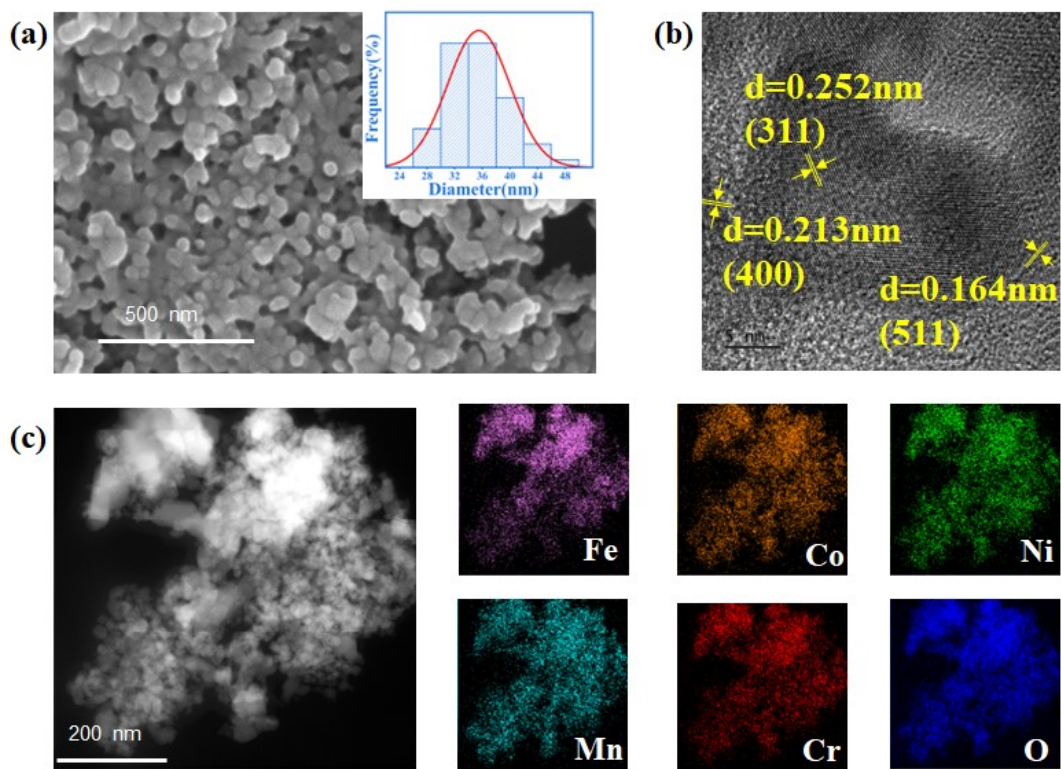

**Fig. S7.** (a) SEM image, (b) HRTEM image, (c) EDS mapping of HEO-850.

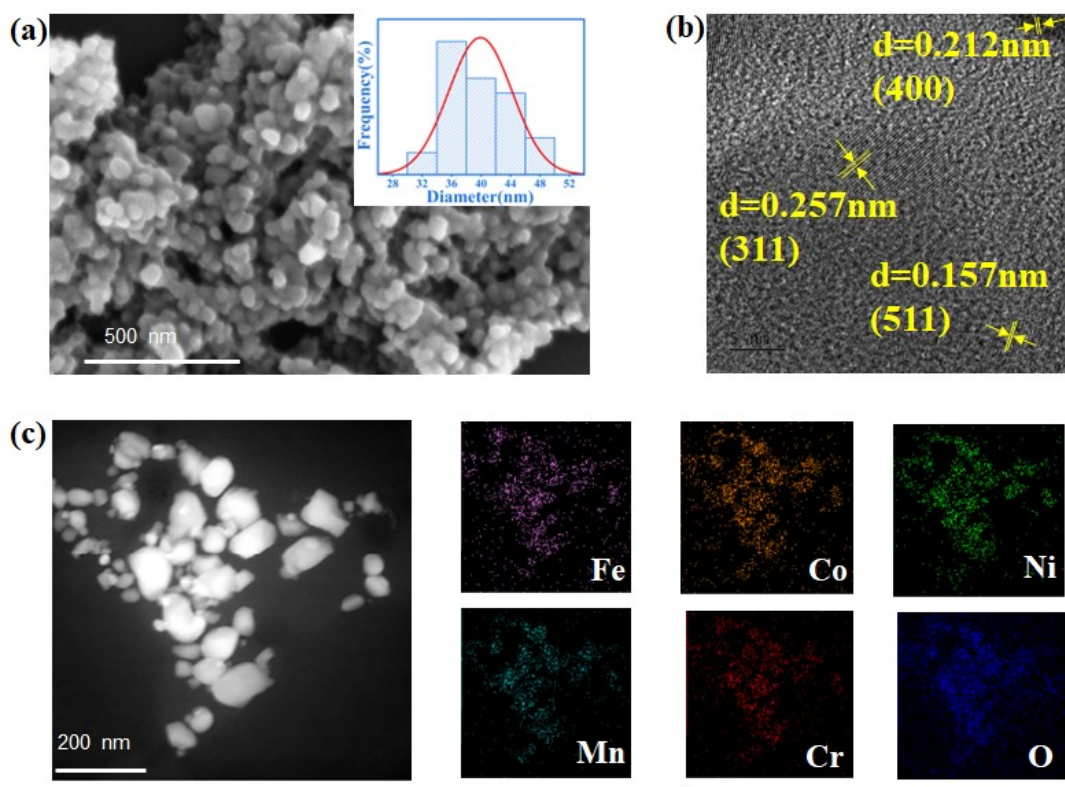

**Fig. S8.** (a) SEM image, (b) HRTEM image, (c) EDS mapping of HEO-1000.

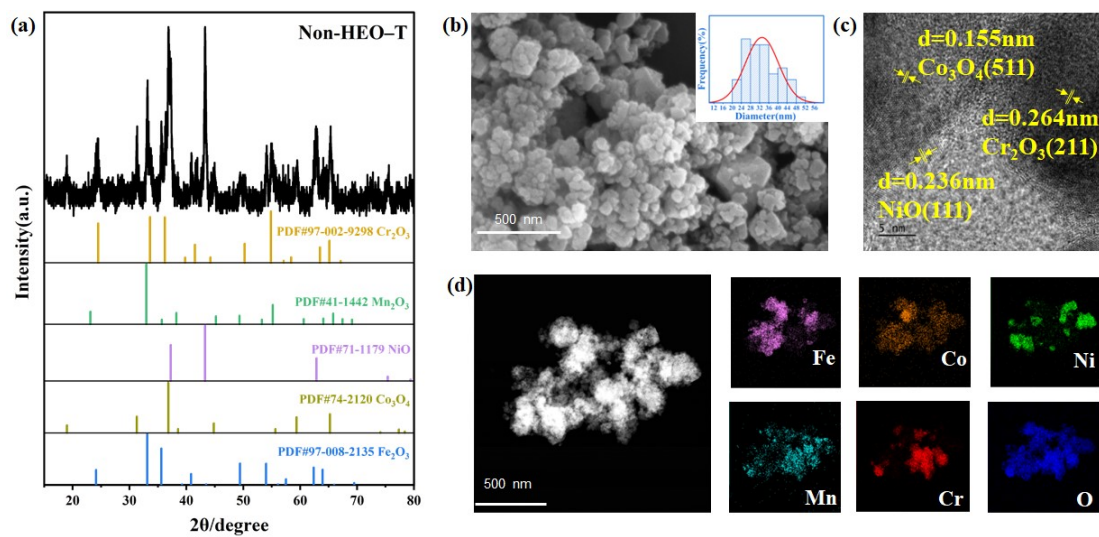

**Fig. S9.** (a) XRD pattern of Non-HEO-T, (b) SEM image, (c) HRTEM image, (d)

EDS mapping of the Non-HEO-T catalyst.

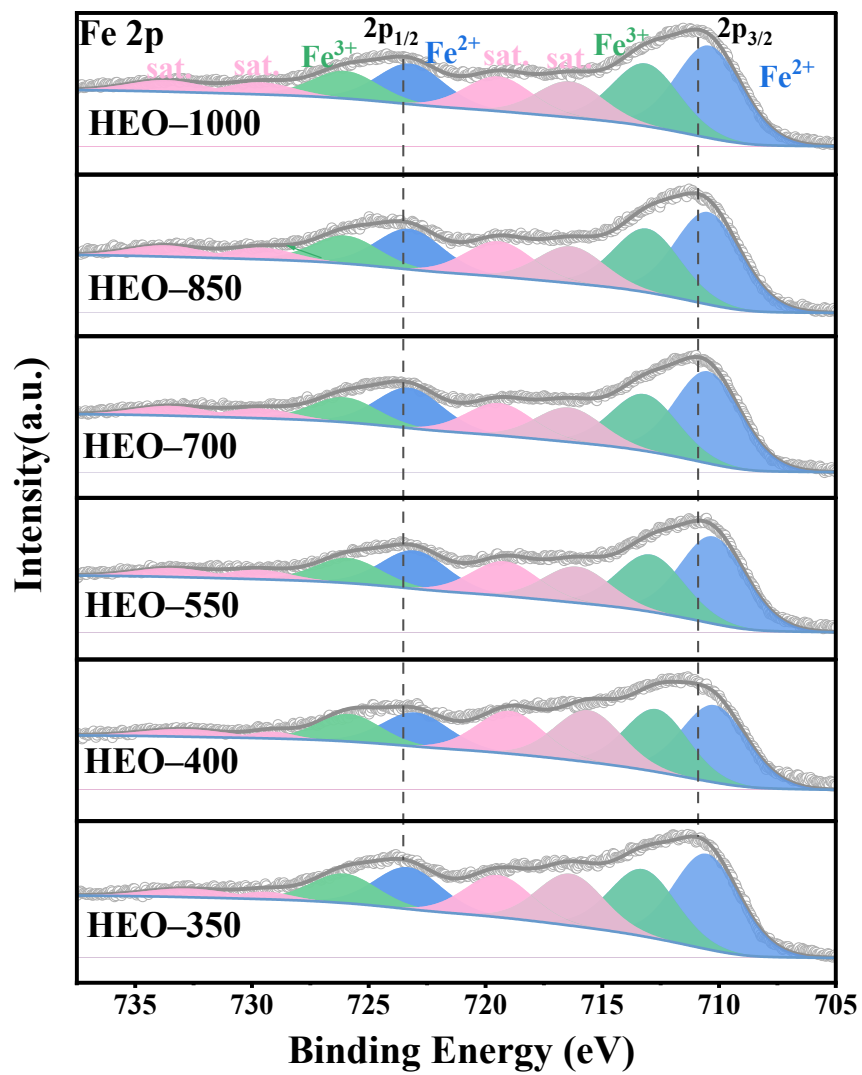

Fig. S10. XPS survey spectrum of Fe 2p of HEO-T catalysts.

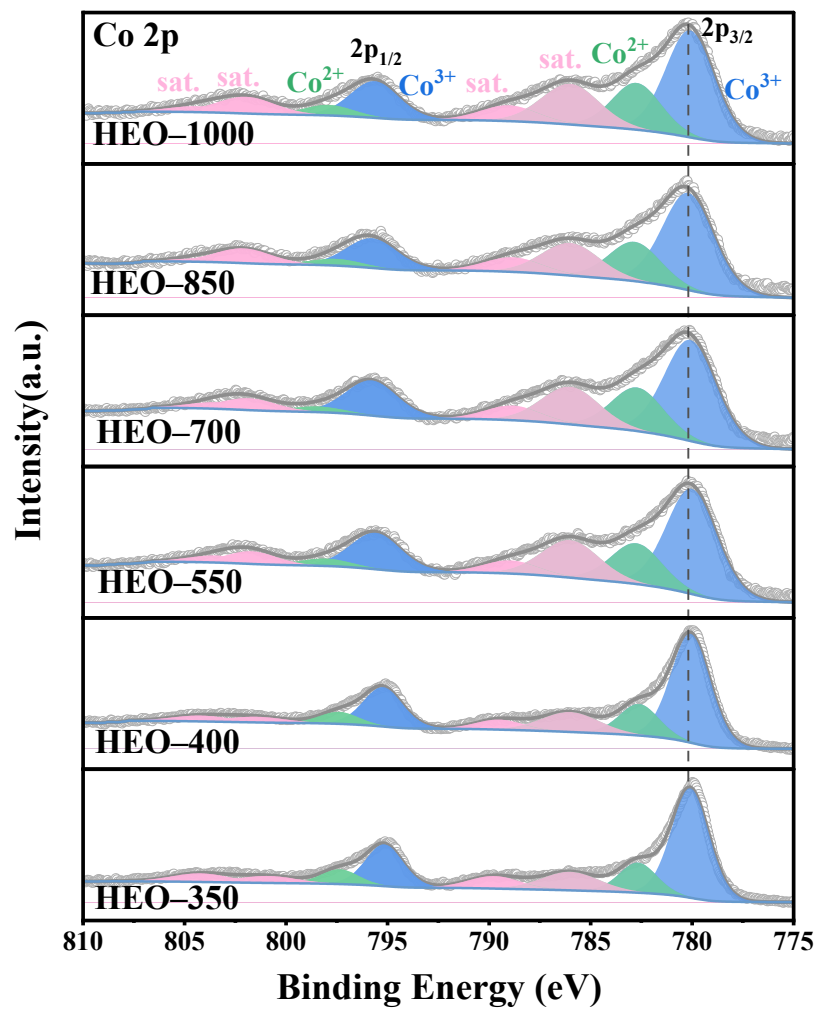

Fig. S11. XPS survey spectrum of Co 2p of HEO-T catalysts.

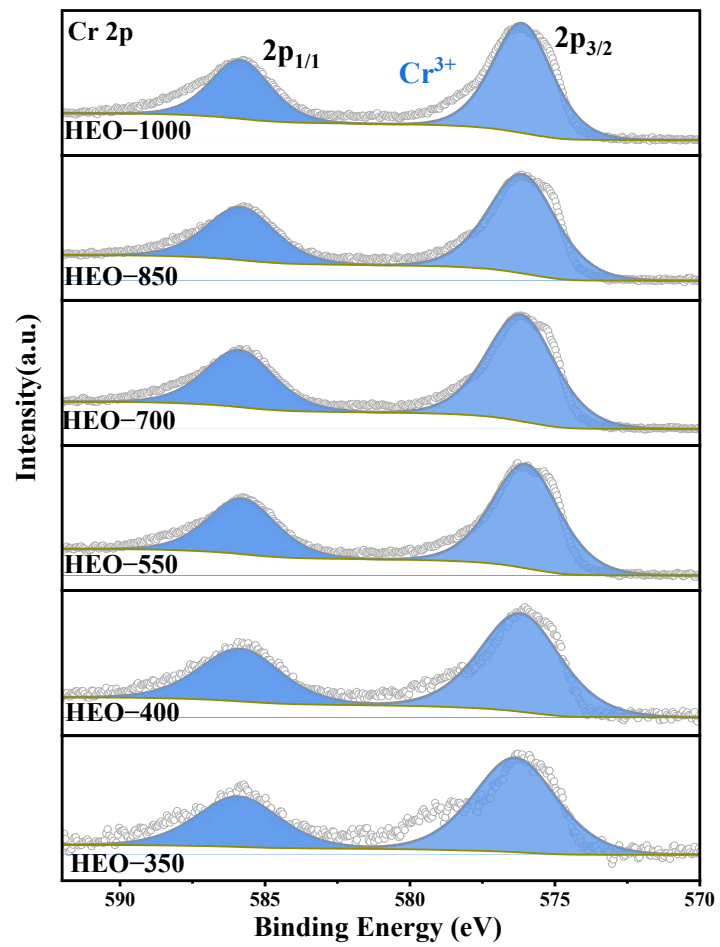

Fig. S12. XPS survey spectrum of Cr 2p of HEO-T catalysts.

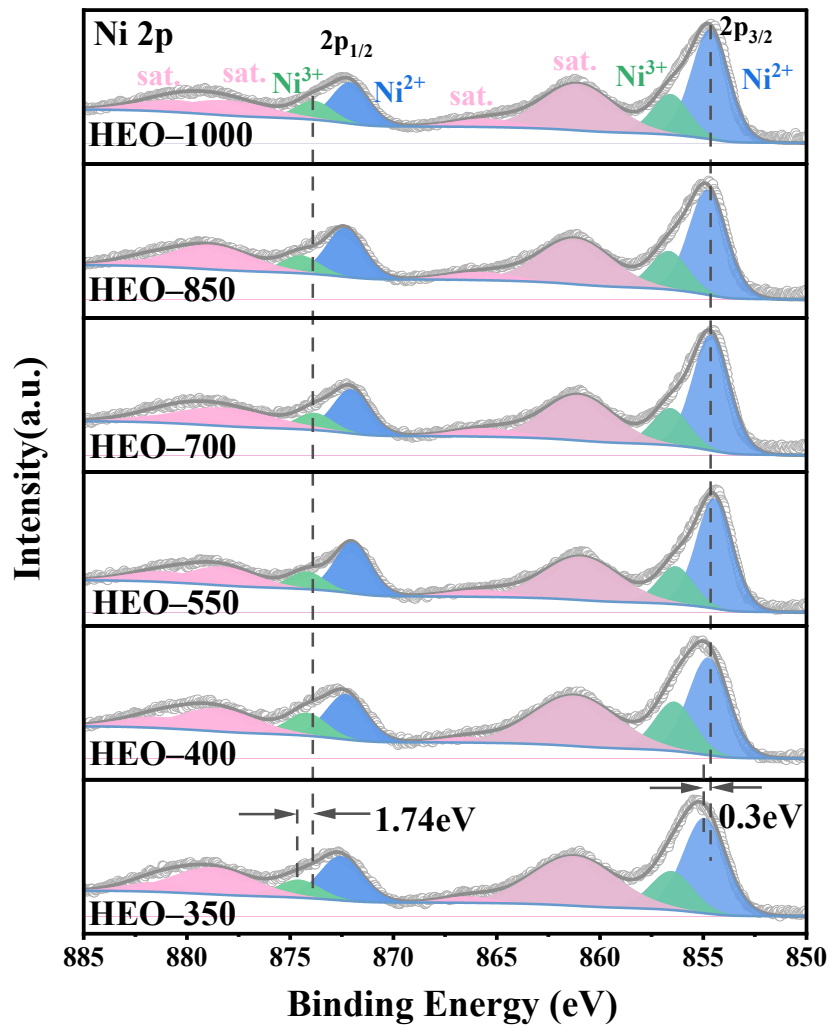

Fig. S13. XPS survey spectrum of Ni 2p of HEO-T catalysts.

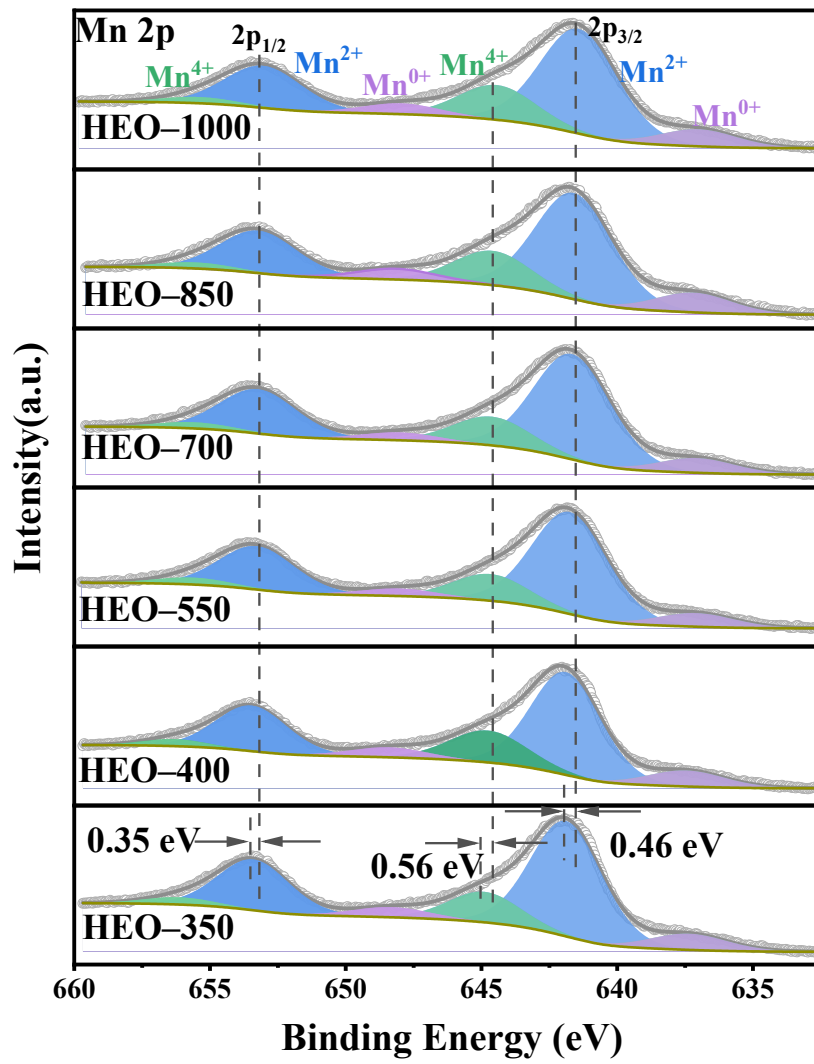

Fig. S14. XPS survey spectrum of Mn 2p of HEO-T catalysts.

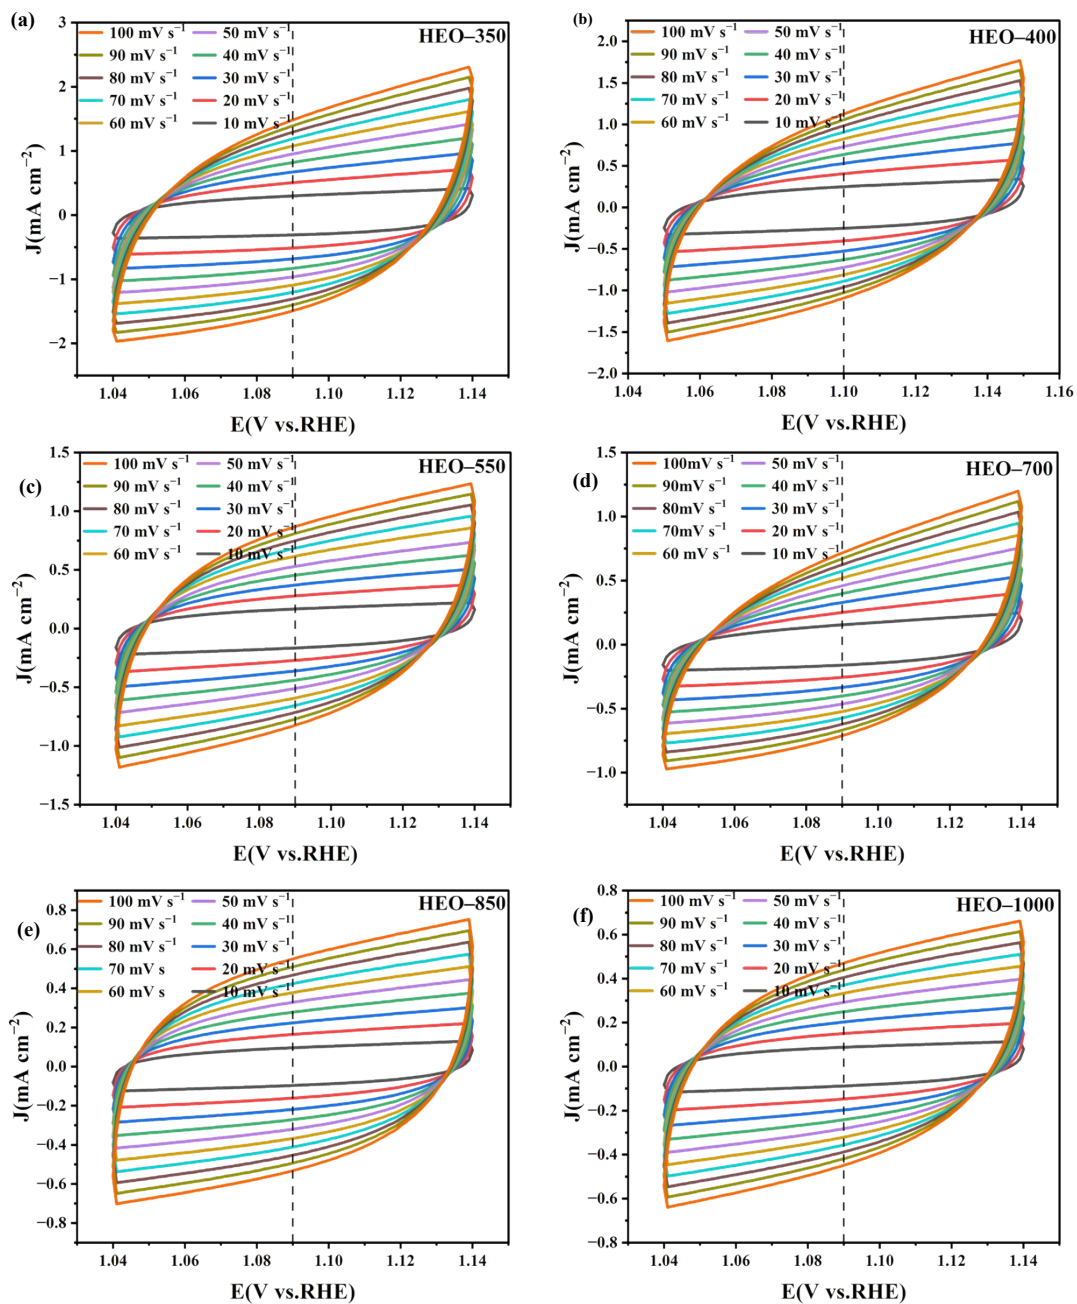

**Fig. S15.** Cyclic voltammetry measurements of (a) HEO-350, (b) -400, (c) -550, (d) -700, (e) -850, and (f) -1000 in a non-Faradaic potential region at various scan rates.

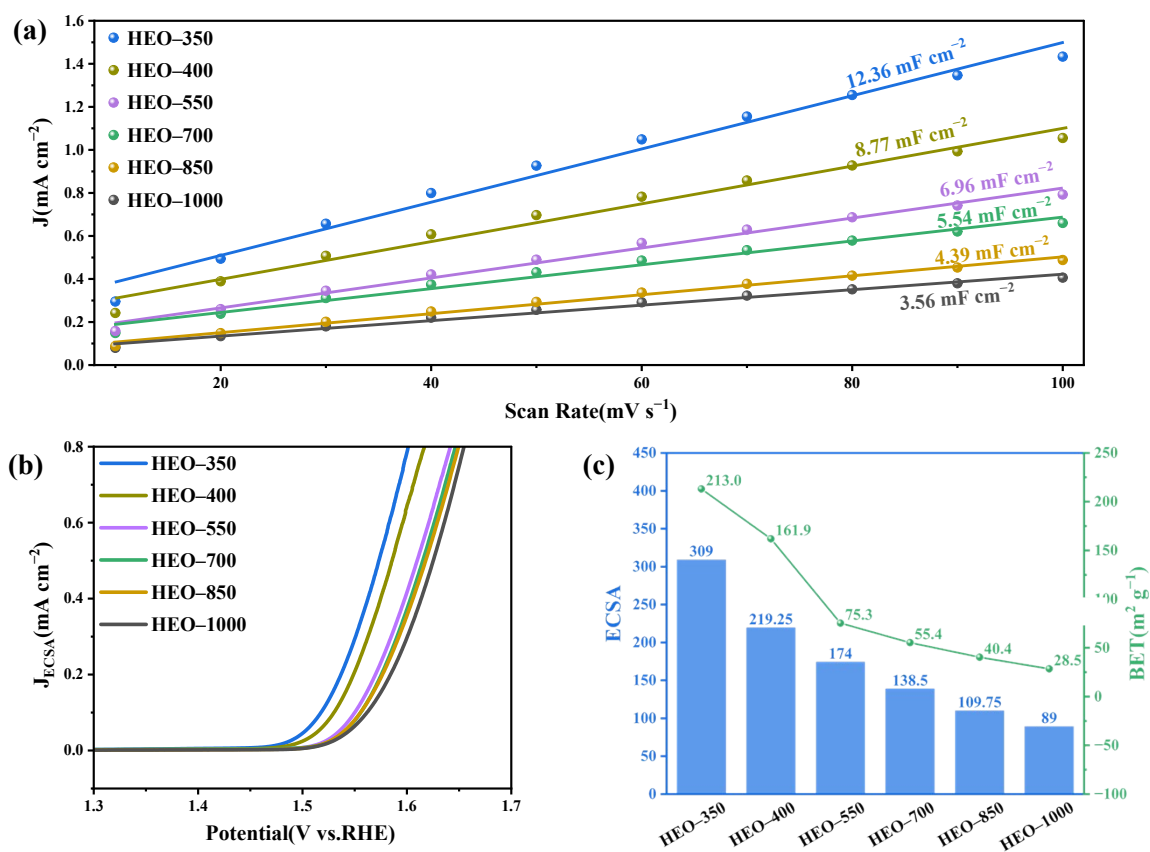

**Fig. S16.** (a)  $C_{dl}$ , (b) Normalized LSV curve of ECSA, (c) ECSA and specific surface area.

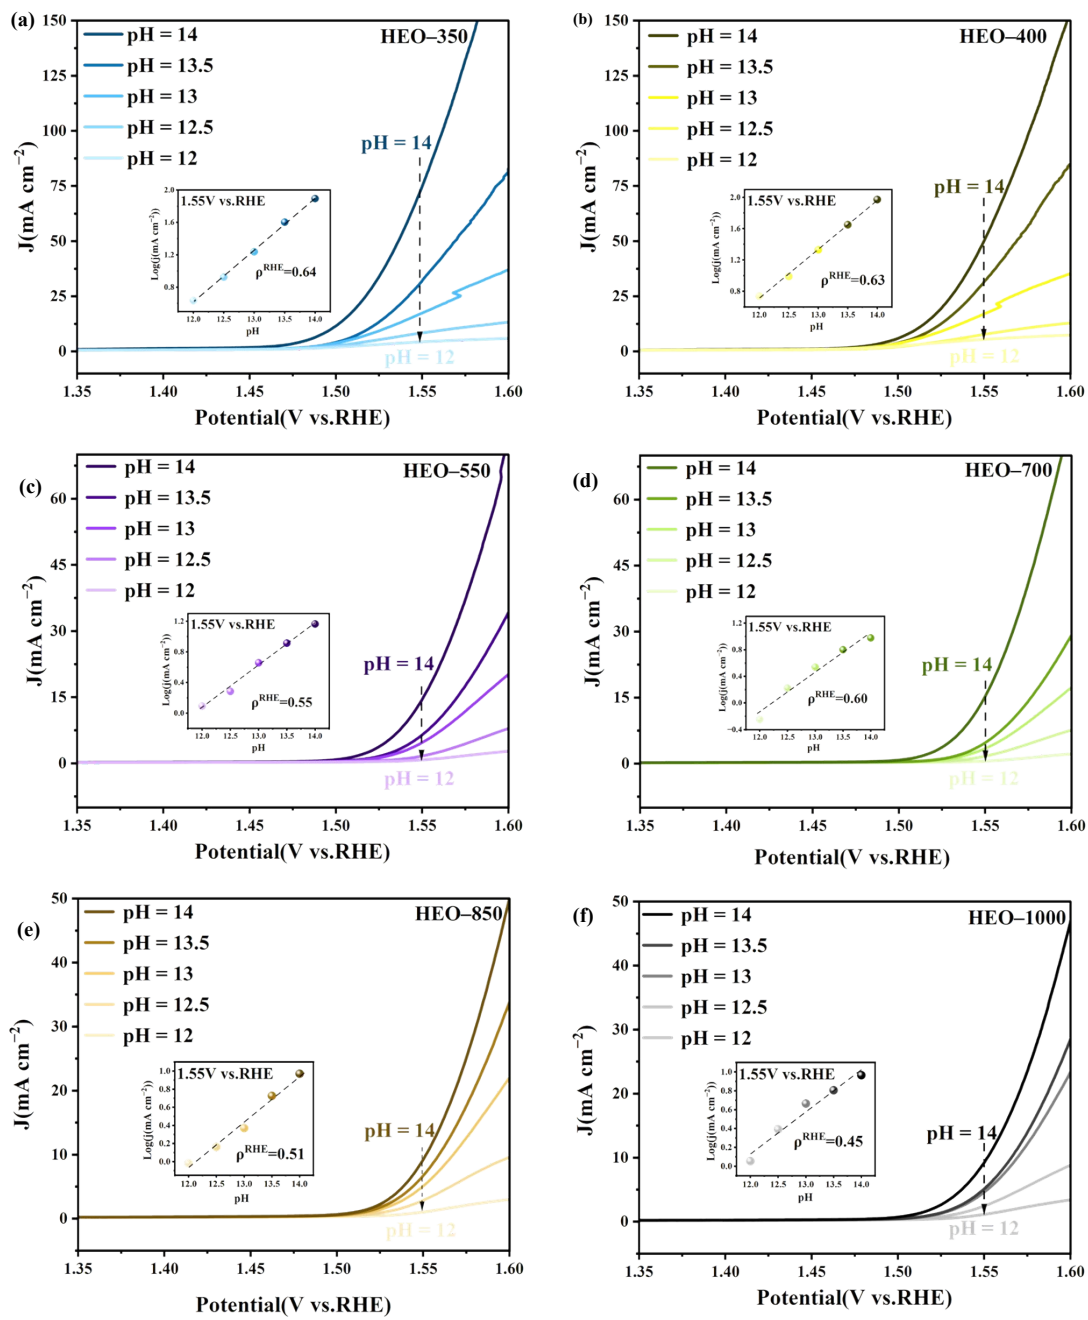

**Fig. S17.** pH dependence of the OER activities of HEO-T.

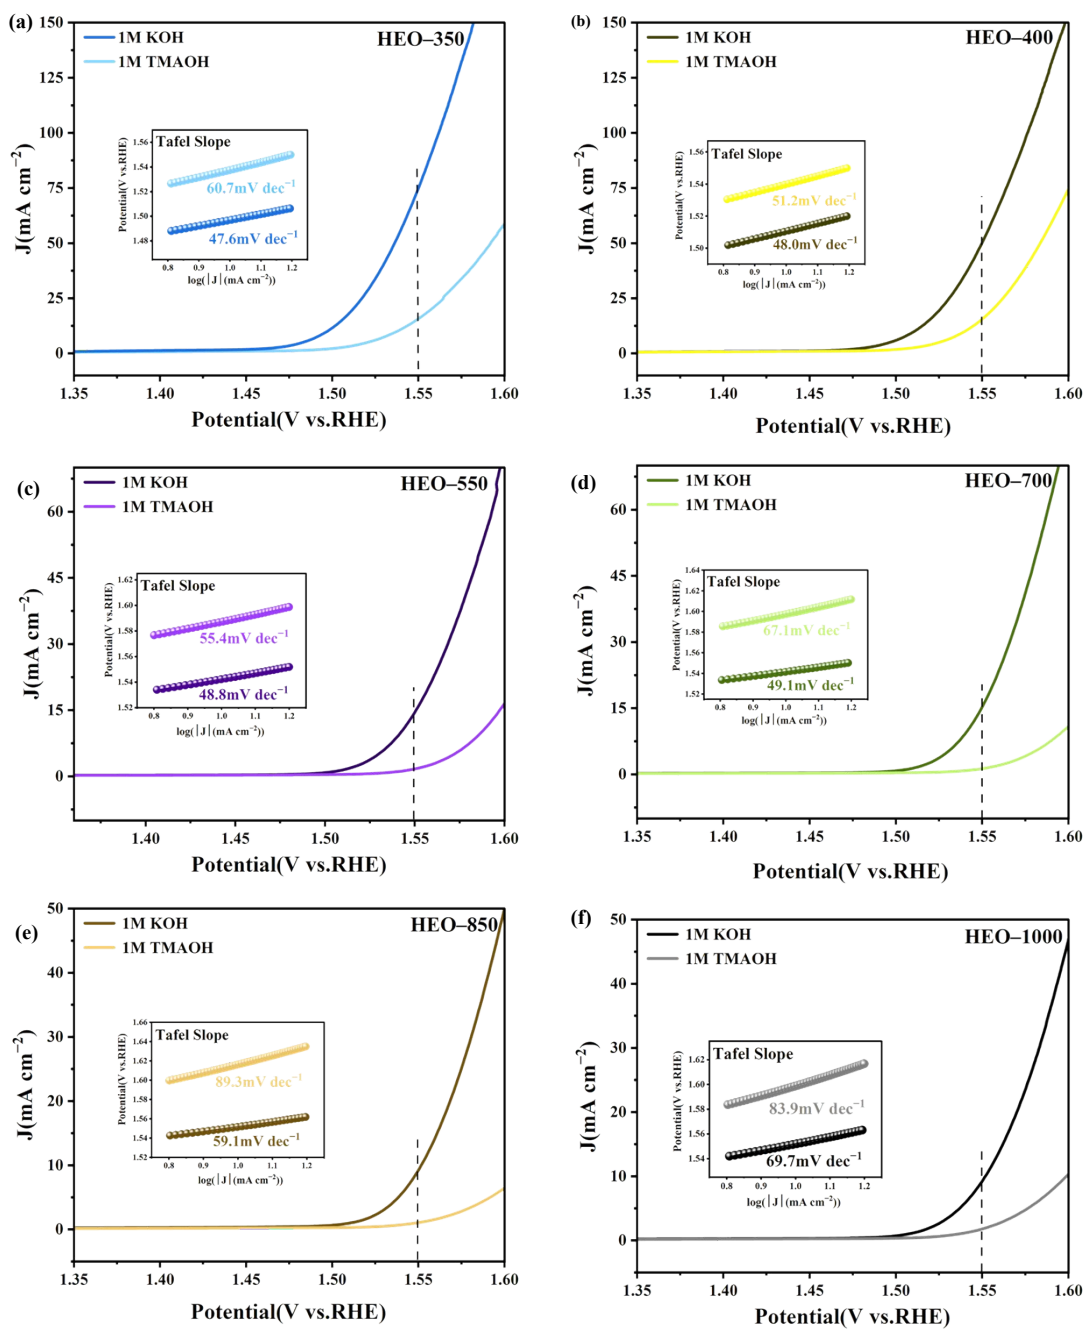

**Fig. S18.** The polarization curves of HEO-T in 1 M KOH and 1 M TMAOH.

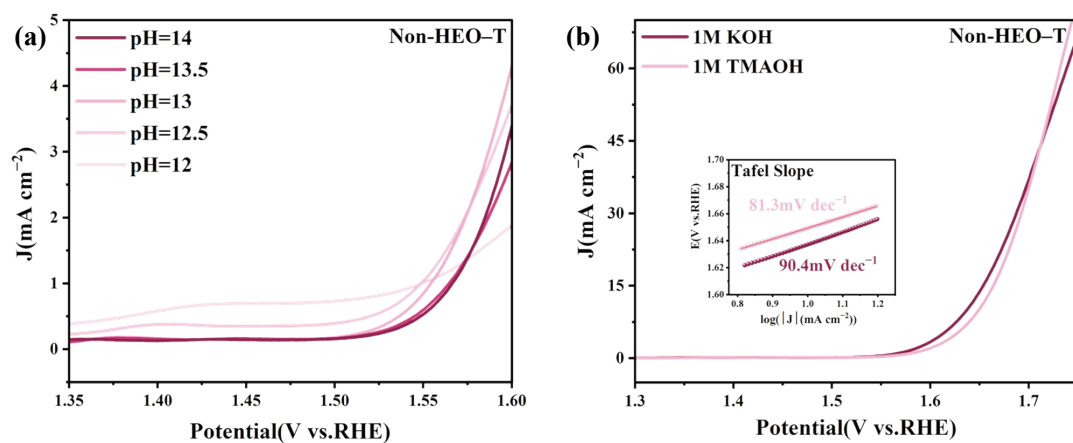

**Fig. S19.** The polarization curves of Non-HEO-T catalyst (a) in KOH with different pH, (b) in 1 M KOH and TMAOH, respectively.

**Table S1.** The results of Pore size information of catalyst from BET.

| Sample                                               | HEO-350 | HEO-400 | HEO-550 | HEO-700 | HEO-850 | HEO-1000 |
|------------------------------------------------------|---------|---------|---------|---------|---------|----------|
| Specific Surface Area [ $\text{m}^2 \text{g}^{-1}$ ] | 213     | 162     | 75      | 55      | 40      | 29       |
| Pore Size [nm]                                       | 7.20    | 9.98    | 13.37   | 13.41   | 15.85   | 21.68    |
| Pore Volume [ $\text{cm}^3 \text{g}^{-1}$ ]          | 0.77    | 0.80    | 0.50    | 0.37    | 0.32    | 0.31     |

**Table S2.** ICP-OES results of the mole fractions of each metal element before and after NaOH etching.

| Steps               | Sample   | Fe(%) | Co(%) | Ni(%) | Mn(%) | Cr(%) | Total  | S <sub>config</sub> |
|---------------------|----------|-------|-------|-------|-------|-------|--------|---------------------|
| Before NaOH Etching | HEO-350  | 21.48 | 21.94 | 22.20 | 21.67 | 12.71 | 100.00 | 1.59R               |
|                     | HEO-400  | 18.50 | 24.76 | 22.07 | 20.12 | 14.55 | 100.00 | 1.59R               |
|                     | HEO-550  | 20.86 | 20.37 | 20.53 | 19.69 | 18.55 | 100.00 | 1.61R               |
|                     | HEO-700  | 20.33 | 20.69 | 21.03 | 18.88 | 19.07 | 100.00 | 1.61R               |
|                     | HEO-850  | 20.11 | 20.42 | 21.32 | 19.00 | 19.15 | 100.00 | 1.61R               |
|                     | HEO-1000 | 19.12 | 20.62 | 20.90 | 20.12 | 19.24 | 100.00 | 1.61R               |
| After NaOH Etching  | HEO-350  | 22.40 | 23.70 | 23.80 | 22.20 | 7.90  | 100.00 | 1.55R               |
|                     | HEO-400  | 15.70 | 30.80 | 22.20 | 20.40 | 10.90 | 100.00 | 1.55R               |
|                     | HEO-550  | 20.00 | 21.30 | 21.30 | 19.40 | 18.00 | 100.00 | 1.61R               |
|                     | HEO-750  | 19.90 | 21.10 | 21.30 | 18.70 | 19.00 | 100.00 | 1.61R               |
|                     | HEO-800  | 19.70 | 20.80 | 21.00 | 18.80 | 19.70 | 100.00 | 1.61R               |
|                     | HEO-1000 | 19.50 | 21.40 | 21.10 | 18.70 | 19.30 | 100.00 | 1.61R               |

**Table S3.** ICP content of metal ions in the electrolyte after OER reaction

| Sample                     | Fe (ppm) | Co (ppm) | Ni (ppm) | Mn (ppm) | Cr (ppm) |
|----------------------------|----------|----------|----------|----------|----------|
| Electrolyte after OER test | 0.00     | 0.00     | 0.00     | 0.00     | 0.00     |

**Table S4.** The specific peak positions of Fe 2p, Co 2p and Cr 2p of HEO–T catalysts.

| name                               | Peak BE (eV) | name                               | Peak BE (eV) |
|------------------------------------|--------------|------------------------------------|--------------|
| Fe <sup>2+</sup> 2p <sub>3/2</sub> | 710.52       | Co <sup>3+</sup> 2p <sub>3/2</sub> | 780.09       |
| Fe <sup>2+</sup> 2p <sub>1/2</sub> | 723.32       | Co <sup>3+</sup> 2p <sub>1/2</sub> | 795.16       |
| Fe <sup>3+</sup> 2p <sub>3/2</sub> | 713.26       | Co <sup>2+</sup> 2p <sub>3/2</sub> | 782.67       |
| Fe <sup>3+</sup> 2p <sub>1/2</sub> | 726.06       | Co <sup>2+</sup> 2p <sub>1/2</sub> | 797.36       |
| satellite                          | 716.37       | satellite                          | 786.00       |
| satellite                          | 719.46       | satellite                          | 789.75       |
| satellite                          | 729.42       | satellite                          | 800.91       |
| satellite                          | 732.73       | satellite                          | 804.23       |
|                                    |              |                                    |              |
| Cr <sup>3+</sup> 2p <sub>3/2</sub> | 576.29       | Cr <sup>3+</sup> 2p <sub>1/2</sub> | 585.83       |

**Table S5.** Elemental composition of HEO-T obtained from XPS.

| Sample   | Fe (%) | Co (%) | Ni (%) | Mn (%) | Cr (%) | Total  |
|----------|--------|--------|--------|--------|--------|--------|
| HEO-350  | 25.45  | 22.65  | 20.14  | 27.82  | 3.94   | 100.00 |
| HEO-400  | 22.80  | 23.81  | 19.29  | 27.85  | 6.95   | 100.00 |
| HEO-550  | 23.26  | 16.67  | 17.57  | 29.69  | 12.81  | 100.00 |
| HEO-700  | 21.83  | 18.50  | 17.75  | 28.66  | 13.26  | 100.00 |
| HEO-850  | 21.78  | 18.11  | 21.13  | 25.75  | 13.23  | 100.00 |
| HEO-1000 | 23.18  | 17.49  | 19.01  | 26.79  | 13.53  | 100.00 |

**Table S6.** Comparison of the OER activities of HEO-350 with other high entropy catalysts at 10 mA cm<sup>-2</sup> current density.

| Catalyst                                                                                                                                       | Overpotential (mV) | Tafel slope (mV dec <sup>-1</sup> ) | Ref.                                                       |
|------------------------------------------------------------------------------------------------------------------------------------------------|--------------------|-------------------------------------|------------------------------------------------------------|
| HEO-350                                                                                                                                        | 267                | 47.6                                | This work                                                  |
| HEO-400                                                                                                                                        | 281                | 48.0                                | This work                                                  |
| HEO-550                                                                                                                                        | 309                | 48.8                                | This work                                                  |
| HEO-700                                                                                                                                        | 318                | 49.1                                | This work                                                  |
| HEO-850                                                                                                                                        | 323                | 59.1                                | This work                                                  |
| HEO-1000                                                                                                                                       | 335                | 69.7                                | This work                                                  |
| Non-HEO-T                                                                                                                                      | 407                | 81.3                                | This work                                                  |
| La(Cr <sub>0.2</sub> Mn <sub>0.2</sub> Fe <sub>0.2</sub> Co <sub>0.2</sub> Ni <sub>0.2</sub> )O <sub>3</sub>                                   | 290                | 54.4                                | <i>Adv. Fiber Mater.</i> , 2025, <b>7</b> , 563–573        |
| ZnCo <sub>2</sub> O <sub>4</sub> -xFX/CNTs                                                                                                     | 350                | 59.2                                | <i>Angew Chem Int Ed</i> , 2023, <b>62</b> , e202301408    |
| (CoNiMnZnFe) <sub>3</sub> O <sub>3.2</sub>                                                                                                     | 336                | 47.5                                | <i>J. Alloys Compd.</i> , 2021, <b>868</b> , 159064        |
| Sr <sub>0.95</sub> Co <sub>0.8</sub> Fe <sub>0.2</sub> O <sub>3-δ</sub>                                                                        | 370                | 49.0                                | <i>Electrochim. Acta</i> , 2019, <b>300</b> , 85–92        |
| La <sub>0.7</sub> Sr <sub>0.3</sub> Co <sub>0.2</sub> Mn <sub>0.2</sub> Ni <sub>0.2</sub> Fe <sub>0.2</sub> Al <sub>0.2</sub> O <sub>3-x</sub> | 339                | 73.9                                | <i>Int. J. Hydrogen Energy</i> , 2024, <b>84</b> , 192–199 |
| (Ba <sub>0.9</sub> La <sub>0.1</sub> ) <sub>0.9</sub> Co <sub>0.6</sub> Fe <sub>0.2</sub> Ni <sub>0.2</sub> O <sub>3-δ</sub>                   | 294                | 55.0                                | <i>Int. J. Hydrogen Energy</i> , 2024, <b>51</b> , 593–604 |
| Sr <sub>0.9</sub> Ce <sub>0.05</sub> Fe <sub>0.95</sub> Ru <sub>0.05</sub> O <sub>3</sub> -RuO <sub>2</sub>                                    | 295                | 77.0                                | <i>Nanoscale</i> , 2023, <b>15</b> , 677–686               |
| Co <sub>3</sub> O <sub>4</sub> /Co-Fe oxide                                                                                                    | 297                | 61.0                                | <i>Adv. Mater.</i> , 2018, <b>30</b> , 1801211             |
| La(CrMnFeCoNi)O <sub>3</sub>                                                                                                                   | 325                | 51.0                                | <i>Adv. Fiber Mater.</i> , 2021, <b>31</b> , 2101632       |
| (FeCoNiCuZn)O                                                                                                                                  | 323                | 64.5                                | <i>Chem. Eng. J.</i> , 2024, <b>481</b> 148428             |
